# Supplementary material for: Network Protein Interaction in Parkinson’s Disease and Periodontitis Interplay: A Preliminary Bioinformatic Analysis
Source: MDPI journal article supplement (doi:10.3390/genes11111385), 2020-11-23
Supplement: s1 [file s1]

1 Table S1. Genes expressing protein variants related to Periodontitis  
2

| Mapped gene                  | Reported trait          |
|------------------------------|-------------------------|
| <i>GLT6D1</i>                | Periodontitis           |
| <i>AL360006.1, KCNK1</i>     | Periodontal microbiota  |
| <i>PKN2-AS1</i>              | Periodontal microbiota  |
| <i>CLIC5, RUNX2</i>          | Periodontal microbiota  |
| <i>Y_RNA, AC064802.1</i>     | Periodontal microbiota  |
| <i>CAMTA1</i>                | Periodontal microbiota  |
| <i>AF111167.2, LINC01220</i> | Periodontal microbiota  |
| <i>TENM2</i>                 | Periodontal microbiota  |
| <i>GRID1</i>                 | Periodontal microbiota  |
| <i>AL360006.1, KCNK1</i>     | Periodontal microbiota  |
| <i>AC016751.2, EXTL2P1</i>   | Periodontal microbiota  |
| <i>DAB2IP, AL596244.1</i>    | Periodontal microbiota  |
| <i>Y_RNA, NAMPTP1</i>        | Periodontal microbiota  |
| <i>FAM166C, OTOF</i>         | Periodontal microbiota  |
| <i>FBXO38</i>                | Periodontal microbiota  |
| <i>UHRF2</i>                 | Periodontal microbiota  |
| <i>TBC1D1</i>                | Periodontal microbiota  |
| <i>AC003044.1</i>            | Periodontitis           |
| <i>AL136967.2, FOXP4-AS1</i> | Periodontitis           |
| <i>ADGRE1</i>                | Periodontitis           |
| <i>TTC6</i>                  | Periodontitis (CDC/AAP) |
| <i>GPN1</i>                  | Periodontitis (CDC/AAP) |
| <i>HLA-DOA</i>               | Periodontitis (CDC/AAP) |
| <i>ITGA8</i>                 | Periodontitis (CDC/AAP) |
| <i>ERGIC1</i>                | Periodontitis (CDC/AAP) |
| <i>LRP1B</i>                 | Periodontitis (CDC/AAP) |
| <i>PRB2, AC078950.1</i>      | Periodontitis (CDC/AAP) |
| <i>C10orf91, AL451069.1</i>  | Periodontitis (CDC/AAP) |
| <i>AL161449.2, Y_RNA</i>     | Periodontitis (CDC/AAP) |
| <i>CEP295NL, TIMP2</i>       | Periodontitis (CDC/AAP) |
| <i>ACTN2</i>                 | Periodontitis (CDC/AAP) |
| <i>KDM4B</i>                 | Periodontitis (CDC/AAP) |
| <i>LINC01828, AC007403.1</i> | Periodontitis (CDC/AAP) |
| <i>AC022239.2, LINC00208</i> | Periodontitis (CDC/AAP) |
| <i>AC015987.1</i>            | Periodontitis (CDC/AAP) |
| <i>MFSD1</i>                 | Periodontitis (CDC/AAP) |
| <i>LINC01262, HSP90AA4P</i>  | Periodontitis (CDC/AAP) |
| <i>IGF2R</i>                 | Periodontitis (CDC/AAP) |
| <i>WDR73, SCAND2P</i>        | Periodontitis (CDC/AAP) |
| <i>PARP15</i>                | Periodontitis (CDC/AAP) |
| <i>RPL35AP19, AC068413.1</i> | Periodontitis (CDC/AAP) |

|                               |                          |
|-------------------------------|--------------------------|
| <i>CSMD1</i>                  | Periodontitis (CDC/AAP)  |
| <i>ETNK2</i>                  | Periodontitis (CDC/AAP)  |
| <i>AC010468.1, AC010468.3</i> | Periodontitis (PAL4Q3)   |
| <i>THSD4</i>                  | Periodontitis (PAL4Q3)   |
| <i>ROBO2</i>                  | Periodontitis (PAL4Q3)   |
| <i>LINC01748, LINC02778</i>   | Periodontitis (PAL4Q3)   |
| <i>DEFA10P, DEFA9P</i>        | Periodontitis (PAL4Q3)   |
| <i>NKAIN3</i>                 | Periodontitis (PAL4Q3)   |
| <i>PPIAP65, LINC01854</i>     | Periodontitis (PAL4Q3)   |
| <i>IGLV10-54</i>              | Periodontitis (PAL4Q3)   |
| <i>ROCK1P1</i>                | Periodontitis (Mean PAL) |
| <i>AC055874.1</i>             | Periodontitis (Mean PAL) |
| <i>SMURF2</i>                 | Periodontitis (Mean PAL) |
| <i>AC027229.1, RN7SL97P</i>   | Periodontitis (Mean PAL) |
| <i>AC015871.1, ST20-MTHFS</i> | Periodontitis (Mean PAL) |
| <i>THSD4</i>                  | Periodontitis (Mean PAL) |
| <i>ZNF579</i>                 | Periodontitis (Mean PAL) |
| <i>ABCA1</i>                  | Periodontitis (Mean PAL) |
| <i>MIR8052, BAK1P2</i>        | Periodontitis (Mean PAL) |
| <i>BCORL1, AL034405.1</i>     | Periodontitis (Mean PAL) |
| <i>BIRC5</i>                  | Periodontitis (Mean PAL) |
| <i>AC063949.1, C12orf74</i>   | Periodontitis (Mean PAL) |
| <i>ST20-AS1, AC015871.2</i>   | Periodontitis (Mean PAL) |
| <i>CDH13, AC009063.2</i>      | Periodontitis (Mean PAL) |
| <i>AC114324.2, LINC02062</i>  | Periodontitis (Mean PAL) |
| <i>ICE2P2, NDUFA5P5</i>       | Periodontitis (Mean PAL) |
| <i>AP001042.1</i>             | Periodontitis (Mean PAL) |
| <i>AC093534.2, RPL35AP15</i>  | Periodontitis (DPAL)     |
| <i>DAOA-AS1, AL138954.1</i>   | Periodontitis (DPAL)     |
| <i>GRIK1</i>                  | Periodontitis (DPAL)     |
| <i>AC093534.2, RPL35AP15</i>  | Periodontitis (DPAL)     |
| <i>NLGN1</i>                  | Periodontitis (DPAL)     |
| <i>AC006059.2, CCDC13</i>     | Periodontitis (DPAL)     |
| <i>PWRN1, AC090983.2</i>      | Periodontitis (DPAL)     |
| <i>SUMF1</i>                  | Periodontitis (DPAL)     |
| <i>LBP</i>                    | Periodontitis (DPAL)     |
| <i>LINC02022</i>              | Periodontitis (DPAL)     |
| <i>AC005208.1, KCNJ16</i>     | Periodontitis (DPAL)     |
| <i>SCN2A</i>                  | Periodontitis (DPAL)     |
| <i>TGIF1</i>                  | Periodontitis (DPAL)     |
| <i>NPAP1, AC090983.2,</i>     |                          |
| <i>PWRN1</i>                  | Periodontitis (DPAL)     |
| <i>ZFPM2</i>                  | Periodontitis (DPAL)     |
| <i>PPIAP65, LINC01854</i>     | Periodontitis (PAL4Q3)   |

|                              |                                                   |
|------------------------------|---------------------------------------------------|
| <i>LINC00907</i>             | Periodontitis (PAL4Q3)                            |
| <i>RBOF1</i>                 | Periodontitis (PAL4Q3)                            |
| <i>LINC01933</i>             | Periodontitis (PAL4Q3)                            |
| <i>HMGB1P5, AC092421.1</i>   | Periodontitis (PAL4Q3)                            |
| <i>DEFA10P, DEFA9P</i>       | Periodontitis (PAL4Q3)                            |
| <i>LINC00907</i>             | Periodontitis (PAL4Q3)                            |
| <i>THSD4</i>                 | Periodontitis (PAL4Q3)                            |
| <i>FAM135B</i>               | Periodontitis (PAL4Q3)                            |
| <i>AC010468.1, CAMK4</i>     | Periodontitis (PAL4Q3)                            |
| <i>FAM126A</i>               | Periodontitis (Mean PAL)                          |
| <i>NKAIN2</i>                | Periodontitis (Mean PAL)                          |
| <i>PSMA8</i>                 | Periodontitis (Mean PAL)                          |
| <i>ERC2</i>                  | Periodontitis (Mean PAL)                          |
| <i>MIR8052, BAK1P2</i>       | Periodontitis (Mean PAL)                          |
| <i>ACTN1</i>                 | Periodontitis (Mean PAL)                          |
| <i>DKK1, RPL31P44</i>        | Periodontitis (Mean PAL)                          |
| <i>AL591501.1</i>            | Periodontitis (Mean PAL)                          |
| <i>FIZ1</i>                  | Periodontitis (Mean PAL)                          |
| <i>HMX3, ACADSB</i>          | Periodontitis (Mean PAL)                          |
| <i>HS6ST2</i>                | Periodontitis (Mean PAL)                          |
| <i>LINC01278</i>             | Periodontitis (Mean PAL)                          |
| <i>AC090666.1, LINC01919</i> | Periodontitis (Mean PAL)                          |
| <i>NKAIN2</i>                | Periodontitis (Mean PAL)                          |
| <i>HNRNPA1P58, NRSN1</i>     | Periodontitis (Mean PAL)                          |
| <i>AC123023.1, LINC01811</i> | Periodontitis (Mean PAL)                          |
| <i>GDF15</i>                 | Periodontitis (Mean PAL)                          |
| <i>NPM1P2</i>                | Periodontitis (Mean PAL)                          |
| <i>AC063965.1, PTEN</i>      | Periodontitis (Mean PAL)                          |
| <i>PTPRT</i>                 | Periodontitis (Mean PAL)                          |
| <i>CSMD1</i>                 | Periodontitis (CDC/AAP)                           |
| <i>RGMA, AC108457.1</i>      | Periodontitis (CDC/AAP)                           |
| <i>AC022239.2, LINC00208</i> | Periodontitis (CDC/AAP)                           |
| <i>AC022239.2, LINC00208</i> | Periodontitis (CDC/AAP)                           |
| <i>KDM4B</i>                 | Periodontitis (CDC/AAP)                           |
| <i>AC090365.1, CDH2</i>      | Periodontal disease-related phenotype (Socransky) |
| <i>FHOD3</i>                 | Periodontal disease-related phenotype (Socransky) |
| <i>LINC02855, HAS2-AS1</i>   | Periodontal disease-related phenotype (Socransky) |
| <i>HSP90AB2P, U6</i>         | Periodontal disease-related phenotype (Socransky) |
| <i>GVINP1</i>                | Periodontal disease-related phenotype (Socransky) |
| <i>AL356124.1</i>            | Periodontal disease-related phenotype (Socransky) |
| <i>HSP90AB2P, U6</i>         | Periodontal disease-related phenotype (Socransky) |
| <i>OSBPL10</i>               | Periodontal disease-related phenotype (Socransky) |
| <i>AL355838.1</i>            | Periodontal disease-related phenotype (Socransky) |

|                              |                                                   |
|------------------------------|---------------------------------------------------|
| <i>CDKL1</i>                 | Periodontal disease-related phenotype (Socransky) |
| <i>CRACR2A</i>               | Chronic periodontitis (localised)                 |
| <i>KCNQ5</i>                 | Periodontitis                                     |
| <i>GPR141, EPDR1</i>         | Periodontitis                                     |
| <i>C5AR1</i>                 | Chronic periodontitis                             |
| <i>DLG2</i>                  | Chronic periodontitis                             |
| <i>SIGLEC5, AC018755.2</i>   | Periodontitis                                     |
| <i>AP000959.1, MAPK6P2</i>   | Periodontitis                                     |
| <i>RNU6-675P, TEX51</i>      | Periodontitis                                     |
| <i>MIR297, LYPLA1P2</i>      | Periodontitis                                     |
| <i>AL109933.3</i>            | Periodontitis                                     |
| <i>LINC01239, AL391117.1</i> | Periodontitis                                     |
| <i>AL354916.1, CUX2P1</i>    | Periodontitis                                     |
| <i>NUDT5</i>                 | Periodontitis                                     |
| <i>AC004241.1</i>            | Periodontitis                                     |
| <i>HUNK</i>                  | Periodontitis                                     |

5 Table S2. Genes expressing protein variants related to Parkinson's Disease  
6

| Mapped gene                                                | Reported trait                            |
|------------------------------------------------------------|-------------------------------------------|
| <i>SIRLNT</i> , <i>AC022733.2</i>                          | Parkinson's disease (motor and cognition) |
| <i>LMNB1</i> , <i>MARCH3</i>                               | Parkinson's disease (motor and cognition) |
| <i>CLRN3</i>                                               | Parkinson's disease (motor and cognition) |
| <i>ODAPH</i>                                               | Parkinson's disease (motor and cognition) |
| <i>CTC1</i>                                                | Parkinson's disease (motor and cognition) |
| <i>PLPPR1</i>                                              | Parkinson's disease (age at diagnosis)    |
| <i>AC093866.1</i>                                          | Parkinson's disease                       |
| <i>LINC02210-CRHR1</i> , <i>LINC02210</i>                  | Parkinson's disease                       |
| <i>HLA-DQA1</i> , <i>HLA-DRB1</i>                          | Parkinson's disease                       |
| <i>RN7SL813P</i> , <i>STK39</i>                            | Parkinson's disease                       |
| <i>GAK</i>                                                 | Parkinson's disease                       |
| <i>GCH1</i>                                                | Parkinson's disease                       |
| <i>MCCC1</i> , <i>DCUN1D1</i>                              | Parkinson's disease                       |
| <i>KLHL7-DT</i> , <i>FAM126A</i>                           | Parkinson's disease                       |
| <i>RAB29</i> , <i>NUCKS1</i>                               | Parkinson's disease                       |
| <i>TIAL1</i> , <i>RAD1P1</i>                               | Parkinson's disease                       |
| <i>FAM47E</i> , <i>FAM47E-STBD1</i> ,<br><i>AC034139.1</i> | Parkinson's disease                       |
| <i>BST1</i>                                                | Parkinson's disease                       |
| <i>RIT2</i>                                                | Parkinson's disease                       |
| <i>AL009179.1</i>                                          | Parkinson's disease                       |
| <i>CCDC62</i>                                              | Parkinson's disease                       |
| <i>OR5AZ1P</i> , <i>OR5BD1P</i>                            | Parkinson's disease                       |
| <i>LINC02451</i>                                           | Parkinson's disease                       |
| <i>SH3GL2</i>                                              | Parkinson's disease                       |
| <i>SYT17</i>                                               | Parkinson's disease                       |
| <i>NDUFAF2</i>                                             | Parkinson's disease                       |
| <i>CA8</i>                                                 | Parkinson's disease                       |
| <i>AC067852.1</i>                                          | Parkinson's disease                       |
| <i>LRRK2</i>                                               | Parkinson's disease                       |
| <i>AC087311.2</i> , <i>SYT10</i>                           | Parkinson's disease                       |
| <i>GBA</i>                                                 | Parkinson's disease                       |
| <i>TMEM175</i>                                             | Parkinson's disease                       |
| <i>BST1</i>                                                | Parkinson's disease                       |
| <i>LRRK2</i>                                               | Parkinson's disease                       |
| <i>LAMTOR2</i> , <i>RAB25</i>                              | Parkinson's disease                       |
| <i>CCNT2-AS1</i>                                           | Parkinson's disease                       |
| <i>MCCC1</i>                                               | Parkinson's disease                       |
| <i>AC093866.1</i>                                          | Parkinson's disease                       |
| <i>RN7SL813P</i> , <i>STK39</i>                            | Parkinson's disease                       |
| <i>CCDC62</i>                                              | Parkinson's disease                       |

|                                         |                                                      |
|-----------------------------------------|------------------------------------------------------|
| <i>AC093866.1</i>                       | Parkinson's disease                                  |
| <i>GAK</i>                              | Parkinson's disease                                  |
| <i>NSF</i>                              | Parkinson's disease                                  |
| <i>SEMA5A</i>                           | Parkinson's disease                                  |
| <i>TMEM72-AS1, AL356157.1</i>           | Parkinson's disease                                  |
| <i>STAP1</i>                            | Parkinson's disease                                  |
| <i>DLG2</i>                             | Parkinson's disease                                  |
| <i>AC093866.1</i>                       | Parkinson's disease                                  |
| <i>BST1</i>                             | Parkinson's disease                                  |
| <i>SLC2A13</i>                          | Parkinson's disease                                  |
| <i>AC119673.1</i>                       | Parkinson's disease                                  |
| <i>GAK</i>                              | Parkinson's disease (familial)                       |
| <i>PLEKHM1</i>                          | Parkinson's disease                                  |
| <i>TAS1R2, PAX7</i>                     | Parkinson's disease                                  |
| <i>BRINP1</i>                           | Parkinson's disease                                  |
| <i>DGKQ</i>                             | Parkinson's disease                                  |
| <i>AC034213.1, GFPT2</i>                | Parkinson's disease                                  |
| <i>SNCA</i>                             | Parkinson's disease                                  |
| <i>FAM47E, FAM47E-STBD1, AC034139.1</i> | Parkinson's disease                                  |
| <i>AC093866.1</i>                       | Parkinson's disease                                  |
| <i>MAPT-AS1, SPPL2C</i>                 | Parkinson's disease                                  |
| <i>MCCC1</i>                            | Parkinson's disease                                  |
| <i>TMEM175</i>                          | Parkinson's disease                                  |
| <i>RIT2</i>                             | Parkinson's disease                                  |
| <i>SREBF1</i>                           | Parkinson's disease                                  |
| <i>LRRK2</i>                            | Parkinson's disease                                  |
| <i>SLC41A1</i>                          | Parkinson's disease                                  |
| <i>AJ009632.2</i>                       | Parkinson's disease                                  |
| <i>NSF</i>                              | Parkinson's disease                                  |
| <i>UNC13B</i>                           | Parkinson's disease                                  |
| <i>WNT3</i>                             | Parkinson's disease                                  |
| <i>LINC01709, LINC01307</i>             | Parkinson's disease                                  |
| <i>AC093866.1</i>                       | Parkinson's disease                                  |
| <i>AC093866.1</i>                       | Parkinson's disease                                  |
| <i>HLA-DRA</i>                          | Parkinson's disease                                  |
| <i>HLA-DRA</i>                          | Parkinson's disease                                  |
| <i>WNT3</i>                             | Parkinson's disease                                  |
| <i>WNT3</i>                             | Parkinson's disease                                  |
| <i>LINC01709, LINC01307</i>             | Parkinson's disease                                  |
| <i>CCDC82</i>                           | Parkinson's disease                                  |
| <i>TMC3-AS1, TMC3</i>                   | Parkinson's disease                                  |
| <i>COL13A1</i>                          | Parkinson's disease                                  |
| <i>LINC00476</i>                        | Parkinson's disease (pesticide exposure interaction) |

|                               |                     |
|-------------------------------|---------------------|
| <i>AC011586.2</i>             | Parkinson's disease |
| <i>SPTSSB</i>                 | Parkinson's disease |
| <i>DLG2</i>                   | Parkinson's disease |
| <i>ZNF165, ZSCAN16-AS1</i>    | Parkinson's disease |
| <i>LRRK2, AC079630.1</i>      | Parkinson's disease |
| <i>CCDC62</i>                 | Parkinson's disease |
| <i>GCH1</i>                   | Parkinson's disease |
| <i>TMEM229B</i>               | Parkinson's disease |
| <i>AC018618.1</i>             | Parkinson's disease |
| <i>BCKDK</i>                  | Parkinson's disease |
| <i>MAPT</i>                   | Parkinson's disease |
| <i>RIT2</i>                   | Parkinson's disease |
| <i>TMPRSS9</i>                | Parkinson's disease |
| <i>LZTS3, DDRGK1</i>          | Parkinson's disease |
| <i>ITPKB</i>                  | Parkinson's disease |
| <i>MAP4K4</i>                 | Parkinson's disease |
| <i>SCN2A</i>                  | Parkinson's disease |
| <i>TBC1D5</i>                 | Parkinson's disease |
| <i>IP6K2</i>                  | Parkinson's disease |
| <i>ITIH1</i>                  | Parkinson's disease |
| <i>RNU1-138P, CAMK2D</i>      | Parkinson's disease |
| <i>NDUFAF2</i>                | Parkinson's disease |
| <i>GPR89P, AL009179.1</i>     | Parkinson's disease |
| <i>CTSB</i>                   | Parkinson's disease |
| <i>HLA-DQB1, MTCO3P1</i>      | Parkinson's disease |
| <i>GPNUMB</i>                 | Parkinson's disease |
| <i>AGAP1</i>                  | Parkinson's disease |
| <i>INPP5F</i>                 | Parkinson's disease |
| <i>PAM</i>                    | Parkinson's disease |
| <i>AP001979.1, IGSF9B</i>     | Parkinson's disease |
| <i>CCN6, LINC02527</i>        | Parkinson's disease |
| <i>AC103957.1, AC103957.2</i> | Parkinson's disease |
| <i>GBF1</i>                   | Parkinson's disease |
| <i>CAB39L</i>                 | Parkinson's disease |
| <i>AL359502.1, PSMA6P4</i>    | Parkinson's disease |
| <i>AL355773.1, KTN1</i>       | Parkinson's disease |
| <i>LTK</i>                    | Parkinson's disease |
| <i>ITGA2B</i>                 | Parkinson's disease |
| <i>Y_RNA, MED13</i>           | Parkinson's disease |
| <i>HMGN2P18, KRTCAP2</i>      | Parkinson's disease |
| <i>RAB29, NUCKS1</i>          | Parkinson's disease |
| <i>SIPA1L2</i>                | Parkinson's disease |
| <i>CCNT2-AS1</i>              | Parkinson's disease |

|                                         |                                              |
|-----------------------------------------|----------------------------------------------|
| <i>RN7SL813P, STK39</i>                 | Parkinson's disease                          |
| <i>MCCC1</i>                            | Parkinson's disease                          |
| <i>TMEM175</i>                          | Parkinson's disease                          |
| <i>BST1</i>                             | Parkinson's disease                          |
| <i>FAM47E, FAM47E-STBD1, AC034139.1</i> | Parkinson's disease                          |
| <i>AC093866.1</i>                       | Parkinson's disease                          |
| <i>BIN3</i>                             | Parkinson's disease                          |
| <i>SH3GL2</i>                           | Parkinson's disease                          |
| <i>ITGA8</i>                            | Parkinson's disease                          |
| <i>GPR65</i>                            | Parkinson's disease                          |
| <i>SYT17</i>                            | Parkinson's disease                          |
| <i>CASC16</i>                           | Parkinson's disease                          |
| <i>WNT9A, CICP26</i>                    | Parkinson's disease                          |
| <i>COL5A2</i>                           | Parkinson's disease                          |
| <i>AC126121.3</i>                       | Parkinson's disease                          |
| <i>AC068633.1, IGSF11</i>               | Parkinson's disease                          |
| <i>LINC02224</i>                        | Parkinson's disease                          |
| <i>AL513124.1, AL355674.1</i>           | Parkinson's disease                          |
| <i>RPA2P1, MDGA2</i>                    | Parkinson's disease                          |
| <i>AC007998.4, AC007998.3</i>           | Parkinson's disease                          |
| <i>LHFPL2</i>                           | Parkinson's disease (familial, age at onset) |
| <i>TRPS1</i>                            | Parkinson's disease (familial, age at onset) |
| <i>KLHDC1</i>                           | Parkinson's disease (familial, age at onset) |
| <i>TPM1</i>                             | Parkinson's disease (familial, age at onset) |
| <i>LINC02210, LINC02210-CRHR1</i>       | Parkinson's disease                          |
| <i>AC093866.1</i>                       | Parkinson's disease                          |
| <i>BST1</i>                             | Parkinson's disease                          |
| <i>AC079385.1</i>                       | Parkinson's disease                          |
| <i>HLA-DRA</i>                          | Parkinson's disease                          |
| <i>PRDM15</i>                           | Parkinson's disease                          |
| <i>AC093866.1</i>                       | Parkinson's disease                          |
| <i>RN7SL813P, STK39</i>                 | Parkinson's disease                          |
| <i>BST1</i>                             | Parkinson's disease                          |
| <i>AL357075.5, CNKSR3</i>               | Parkinson's disease                          |
| <i>TSBP1-AS1, HLA-DRA</i>               | Parkinson's disease                          |
| <i>SLC50A1</i>                          | Parkinson's disease                          |
| <i>CCNT2-AS1</i>                        | Parkinson's disease                          |
| <i>DGKQ</i>                             | Parkinson's disease                          |
| <i>CTSB, FDFT1</i>                      | Parkinson's disease                          |
| <i>SH3GL2</i>                           | Parkinson's disease                          |
| <i>ANO5, AC116534.1</i>                 | Parkinson's disease                          |
| <i>SLC2A13</i>                          | Parkinson's disease                          |
| <i>AC018618.1</i>                       | Parkinson's disease                          |



|                                         |                                                                                     |
|-----------------------------------------|-------------------------------------------------------------------------------------|
| <i>PRSS53, AC135050.2, ZNF646</i>       | Parkinson's disease                                                                 |
| <i>WNT3</i>                             | Parkinson's disease                                                                 |
| <i>RIT2</i>                             | Parkinson's disease                                                                 |
| <i>DSG3</i>                             | Parkinson's disease (age of onset)                                                  |
| <i>AC021979.2, OCA2</i>                 | Parkinson's disease (age of onset)                                                  |
| <i>ATF6</i>                             | Parkinson's disease (age of onset)                                                  |
| <i>QSER1, PRRG4</i>                     | Parkinson's disease (age of onset)                                                  |
| <i>AAK1</i>                             | Parkinson's disease (age of onset)                                                  |
| <i>CNTN1</i>                            | Parkinson's disease                                                                 |
| <i>KANSL1</i>                           | Parkinson's disease                                                                 |
| <i>KCNN3, PMVK</i>                      | Parkinson's disease                                                                 |
| <i>RAB29, NUCKS1</i>                    | Parkinson's disease                                                                 |
| <i>MCCC1</i>                            | Parkinson's disease                                                                 |
| <i>AC093866.1</i>                       | Parkinson's disease                                                                 |
| <i>SLC2A13</i>                          | Parkinson's disease                                                                 |
| <i>DLG2</i>                             | Parkinson's disease                                                                 |
| <i>COL3A1, AC092598.1</i>               | Parkinson disease and lewy body pathology                                           |
| <i>TCEANC2</i>                          | Parkinson disease and lewy body pathology                                           |
| <i>MX2</i>                              | Parkinson disease and lewy body pathology                                           |
| <i>ZP3</i>                              | Parkinson disease and lewy body pathology                                           |
| <i>PABPN1L, TRAPPC2L</i>                | Parkinson disease and lewy body pathology                                           |
| <i>KCNIP4</i>                           | Parkinson disease and lewy body pathology                                           |
| <i>FRG1CP, MIR663AHG</i>                | Parkinson disease and lewy body pathology                                           |
| <i>HTR2A-AS1, HTR2A</i>                 | Parkinson disease and lewy body pathology                                           |
| <i>AC026826.3, AC023968.1</i>           | Parkinson disease and lewy body pathology                                           |
| <i>AC079070.1, LINC02582</i>            | Parkinson disease and lewy body pathology                                           |
| <i>ISM1, AL121782.1</i>                 | Parkinson's disease                                                                 |
| <i>FAM47E, FAM47E-STBD1, AC034139.1</i> | Parkinson's disease                                                                 |
| <i>ITGA8</i>                            | Parkinson's disease                                                                 |
| <i>SNCA</i>                             | Parkinson's disease                                                                 |
| <i>NSF</i>                              | Parkinson's disease                                                                 |
| <i>LINC02210-CRHR1, LINC02210</i>       | Parkinson's disease                                                                 |
| <i>NUCKS1</i>                           | Parkinson's disease                                                                 |
| <i>CYP17A1, WBP1L</i>                   | Parkinson's disease                                                                 |
| <i>MMRN1, SNCA-AS1</i>                  | Parkinson's disease                                                                 |
| <i>AL365295.1, LINC02331</i>            | Parkinson's disease                                                                 |
| <i>PMVK</i>                             | Parkinson's disease or first degree relation to individual with Parkinson's disease |
| <i>FAM47E, SCARB2</i>                   | Parkinson's disease or first degree relation to individual with Parkinson's disease |
| <i>GBA</i>                              | Parkinson's disease or first degree relation to individual with Parkinson's disease |
| <i>AC093866.1</i>                       | Parkinson's disease or first degree relation to individual with Parkinson's disease |
| <i>Z98751.1, VAMP4</i>                  | Parkinson's disease or first degree relation to individual with Parkinson's disease |

|                               |                                                                                     |
|-------------------------------|-------------------------------------------------------------------------------------|
| <i>RNU1-138P, CAMK2D</i>      | Parkinson's disease or first degree relation to individual with Parkinson's disease |
| <i>RAB29</i>                  | Parkinson's disease or first degree relation to individual with Parkinson's disease |
| <i>ELOVL7</i>                 | Parkinson's disease or first degree relation to individual with Parkinson's disease |
| <i>SIPA1L2</i>                | Parkinson's disease or first degree relation to individual with Parkinson's disease |
| <i>KCNS3</i>                  | Parkinson's disease or first degree relation to individual with Parkinson's disease |
| <i>RSL24D1P1, AL009179.2</i>  | Parkinson's disease or first degree relation to individual with Parkinson's disease |
| <i>TRIM40</i>                 | Parkinson's disease or first degree relation to individual with Parkinson's disease |
| <i>HLA-DRB1, HLA-DQA1</i>     | Parkinson's disease or first degree relation to individual with Parkinson's disease |
| <i>RNU4-66P, RIMS1</i>        | Parkinson's disease or first degree relation to individual with Parkinson's disease |
| <i>CCN6, LINC02527</i>        | Parkinson's disease or first degree relation to individual with Parkinson's disease |
| <i>AL137783.1, HMGB1P13</i>   | Parkinson's disease or first degree relation to individual with Parkinson's disease |
| <i>GPNMB</i>                  | Parkinson's disease or first degree relation to individual with Parkinson's disease |
| <i>AC006001.3, AC008267.3</i> | Parkinson's disease or first degree relation to individual with Parkinson's disease |
| <i>CTSB</i>                   | Parkinson's disease or first degree relation to individual with Parkinson's disease |
| <i>AC011586.2</i>             | Parkinson's disease or first degree relation to individual with Parkinson's disease |
| <i>BIN3</i>                   | Parkinson's disease or first degree relation to individual with Parkinson's disease |
| <i>FAM49B</i>                 | Parkinson's disease or first degree relation to individual with Parkinson's disease |
| <i>SH3GL2</i>                 | Parkinson's disease or first degree relation to individual with Parkinson's disease |
| <i>SH3GL2</i>                 | Parkinson's disease or first degree relation to individual with Parkinson's disease |
| <i>UBAP2</i>                  | Parkinson's disease or first degree relation to individual with Parkinson's disease |
| <i>CHRNA1</i>                 | Parkinson's disease or first degree relation to individual with Parkinson's disease |
| <i>RETREG3</i>                | Parkinson's disease or first degree relation to individual with Parkinson's disease |
| <i>UBTF</i>                   | Parkinson's disease or first degree relation to individual with Parkinson's disease |
| <i>FAM171A2</i>               | Parkinson's disease or first degree relation to individual with Parkinson's disease |
| <i>LINC02210-CRHR1</i>        | Parkinson's disease or first degree relation to individual with Parkinson's disease |
| <i>LINC02210-CRHR1</i>        | Parkinson's disease or first degree relation to individual with Parkinson's disease |
| <i>WNT3</i>                   | Parkinson's disease or first degree relation to individual with Parkinson's disease |
| <i>BRIP1</i>                  | Parkinson's disease or first degree relation to individual with Parkinson's disease |
| <i>DNAH17</i>                 | Parkinson's disease or first degree relation to individual with Parkinson's disease |
| <i>ASXL3</i>                  | Parkinson's disease or first degree relation to individual with Parkinson's disease |

|                                         |                                                                                     |
|-----------------------------------------|-------------------------------------------------------------------------------------|
| <i>RIT2</i>                             | Parkinson's disease or first degree relation to individual with Parkinson's disease |
| <i>SRSF10P1, SMAD4</i>                  | Parkinson's disease or first degree relation to individual with Parkinson's disease |
| <i>SPPL2B, AC005258.1</i>               | Parkinson's disease or first degree relation to individual with Parkinson's disease |
| <i>AL035461.3, CRLS1</i>                | Parkinson's disease or first degree relation to individual with Parkinson's disease |
| <i>DYRK1A</i>                           | Parkinson's disease or first degree relation to individual with Parkinson's disease |
| <i>AL135927.1, SEMA4A</i>               | Parkinson's disease or first degree relation to individual with Parkinson's disease |
| <i>TMEM163</i>                          | Parkinson's disease or first degree relation to individual with Parkinson's disease |
| <i>AC093866.1</i>                       | Parkinson's disease or first degree relation to individual with Parkinson's disease |
| <i>SNCA</i>                             | Parkinson's disease or first degree relation to individual with Parkinson's disease |
| <i>ZNF608, AC113398.1</i>               | Parkinson's disease or first degree relation to individual with Parkinson's disease |
| <i>SLC44A4, EHMT2-AS1</i>               | Parkinson's disease or first degree relation to individual with Parkinson's disease |
| <i>DNM1L, FGD4</i>                      | Parkinson's disease or first degree relation to individual with Parkinson's disease |
| <i>MUC19</i>                            | Parkinson's disease or first degree relation to individual with Parkinson's disease |
| <i>MUC19</i>                            | Parkinson's disease or first degree relation to individual with Parkinson's disease |
| <i>AC090630.1</i>                       | Parkinson's disease or first degree relation to individual with Parkinson's disease |
| <i>SCARB2, AC110795.1</i>               | Parkinson's disease or first degree relation to individual with Parkinson's disease |
| <i>HMGN2P18, KRTCAP2</i>                | Parkinson's disease or first degree relation to individual with Parkinson's disease |
| <i>FAM47E-STBD1, AC034139.1, FAM47E</i> | Parkinson's disease or first degree relation to individual with Parkinson's disease |
| <i>AL592295.3, FCGR2A</i>               | Parkinson's disease or first degree relation to individual with Parkinson's disease |
| <i>AC093866.1</i>                       | Parkinson's disease or first degree relation to individual with Parkinson's disease |
| <i>RAB29, NUCKS1</i>                    | Parkinson's disease or first degree relation to individual with Parkinson's disease |
| <i>CLCN3</i>                            | Parkinson's disease or first degree relation to individual with Parkinson's disease |
| <i>ITPKB</i>                            | Parkinson's disease or first degree relation to individual with Parkinson's disease |
| <i>PAM</i>                              | Parkinson's disease or first degree relation to individual with Parkinson's disease |
| <i>AC006077.1</i>                       | Parkinson's disease or first degree relation to individual with Parkinson's disease |
| <i>KCNIP3</i>                           | Parkinson's disease or first degree relation to individual with Parkinson's disease |
| <i>MAP4K4</i>                           | Parkinson's disease or first degree relation to individual with Parkinson's disease |
| <i>TMEM163</i>                          | Parkinson's disease or first degree relation to individual with Parkinson's disease |
| <i>RN7SL813P, STK39</i>                 | Parkinson's disease or first degree relation to individual with Parkinson's disease |
| <i>TBC1D5</i>                           | Parkinson's disease or first degree relation to individual with Parkinson's disease |

|                            |                                                                                     |
|----------------------------|-------------------------------------------------------------------------------------|
| <i>RBMS3, AC098650.1</i>   | Parkinson's disease or first degree relation to individual with Parkinson's disease |
| <i>IP6K2</i>               | Parkinson's disease or first degree relation to individual with Parkinson's disease |
| <i>KPNA1</i>               | Parkinson's disease or first degree relation to individual with Parkinson's disease |
| <i>MED12L</i>              | Parkinson's disease or first degree relation to individual with Parkinson's disease |
| <i>SPTSSB</i>              | Parkinson's disease or first degree relation to individual with Parkinson's disease |
| <i>MCCC1</i>               | Parkinson's disease or first degree relation to individual with Parkinson's disease |
| <i>GAK</i>                 | Parkinson's disease or first degree relation to individual with Parkinson's disease |
| <i>TMEM175</i>             | Parkinson's disease or first degree relation to individual with Parkinson's disease |
| <i>BST1</i>                | Parkinson's disease or first degree relation to individual with Parkinson's disease |
| <i>LCORL</i>               | Parkinson's disease or first degree relation to individual with Parkinson's disease |
| <i>ITGA8</i>               | Parkinson's disease or first degree relation to individual with Parkinson's disease |
| <i>GBF1</i>                | Parkinson's disease or first degree relation to individual with Parkinson's disease |
| <i>BAG3</i>                | Parkinson's disease or first degree relation to individual with Parkinson's disease |
| <i>INPP5F</i>              | Parkinson's disease or first degree relation to individual with Parkinson's disease |
| <i>RNF141</i>              | Parkinson's disease or first degree relation to individual with Parkinson's disease |
| <i>DLG2</i>                | Parkinson's disease or first degree relation to individual with Parkinson's disease |
| <i>IGSF9B</i>              | Parkinson's disease or first degree relation to individual with Parkinson's disease |
| <i>LRRK2, AC079630.1</i>   | Parkinson's disease or first degree relation to individual with Parkinson's disease |
| <i>LRRK2</i>               | Parkinson's disease or first degree relation to individual with Parkinson's disease |
| <i>AC084878.1, SLC38A1</i> | Parkinson's disease or first degree relation to individual with Parkinson's disease |
| <i>HIP1R</i>               | Parkinson's disease or first degree relation to individual with Parkinson's disease |
| <i>FBRSL1, AC079031.2</i>  | Parkinson's disease or first degree relation to individual with Parkinson's disease |
| <i>CAB39L</i>              | Parkinson's disease or first degree relation to individual with Parkinson's disease |
| <i>LINC00456, MBNL2</i>    | Parkinson's disease or first degree relation to individual with Parkinson's disease |
| <i>MIPOL1</i>              | Parkinson's disease or first degree relation to individual with Parkinson's disease |
| <i>GCH1</i>                | Parkinson's disease or first degree relation to individual with Parkinson's disease |
| <i>RPS6KL1</i>             | Parkinson's disease or first degree relation to individual with Parkinson's disease |
| <i>RNU6-835P, GPR65</i>    | Parkinson's disease or first degree relation to individual with Parkinson's disease |
| <i>AC018618.1</i>          | Parkinson's disease or first degree relation to individual with Parkinson's disease |
| <i>SYT17</i>               | Parkinson's disease or first degree relation to individual with Parkinson's disease |

|                               |                                                                                     |
|-------------------------------|-------------------------------------------------------------------------------------|
| <i>RABEP2, CD19</i>           | Parkinson's disease or first degree relation to individual with Parkinson's disease |
| <i>SETD1A</i>                 | Parkinson's disease or first degree relation to individual with Parkinson's disease |
| <i>NOD2</i>                   | Parkinson's disease or first degree relation to individual with Parkinson's disease |
| <i>CASC16</i>                 | Parkinson's disease or first degree relation to individual with Parkinson's disease |
| <i>PHBP21</i>                 | Parkinson's disease or first degree relation to individual with Parkinson's disease |
| <i>GXYLT1</i>                 | Parkinson's disease or first degree relation to individual with Parkinson's disease |
| <i>AC003070.7, AC003070.2</i> | Parkinson's disease or first degree relation to individual with Parkinson's disease |
| <i>LINC02210-CRHR1</i>        | Parkinson's disease or first degree relation to individual with Parkinson's disease |
| <i>MAPT-AS1</i>               | Parkinson's disease or first degree relation to individual with Parkinson's disease |
| <i>KANSL1</i>                 | Parkinson's disease or first degree relation to individual with Parkinson's disease |
| <i>NSF</i>                    | Parkinson's disease or first degree relation to individual with Parkinson's disease |
| <i>LZTS3, DDRGK1</i>          | Parkinson's disease or first degree relation to individual with Parkinson's disease |
| <i>AC093866.1</i>             | Parkinson's disease in GBA mutation carriers                                        |
| <i>CTSB</i>                   | Parkinson's disease in GBA mutation carriers                                        |
| <i>MAPT</i>                   | Parkinson's disease                                                                 |
| <i>RBMS3, AC098650.1</i>      | Parkinson's disease                                                                 |
| <i>AC093866.1</i>             | Parkinson's disease                                                                 |
| <i>LRRK2</i>                  | Parkinson's disease                                                                 |
| <i>LRRK2</i>                  | Parkinson's disease                                                                 |
| <i>DGKQ</i>                   | Parkinson's disease                                                                 |
| <i>AC093866.1</i>             | Parkinson's disease                                                                 |
| <i>MMRN1, SNCA-AS1</i>        | Parkinson's disease                                                                 |
| <i>SNCA</i>                   | Parkinson's disease (age of onset)                                                  |
| <i>SNCA-AS1</i>               | Parkinson's disease (age of onset)                                                  |
| <i>TMEM175</i>                | Parkinson's disease (age of onset)                                                  |
| <i>APOE</i>                   | Parkinson's disease (age of onset)                                                  |
| <i>GCH1</i>                   | Parkinson's disease                                                                 |
| <i>TMEM229B</i>               | Parkinson's disease                                                                 |
| <i>AC018618.1</i>             | Parkinson's disease                                                                 |
| <i>BCKDK</i>                  | Parkinson's disease                                                                 |
| <i>MAPT</i>                   | Parkinson's disease                                                                 |
| <i>RIT2</i>                   | Parkinson's disease                                                                 |
| <i>TMPRSS9</i>                | Parkinson's disease                                                                 |
| <i>LZTS3, DDRGK1</i>          | Parkinson's disease                                                                 |
| <i>AC011586.2</i>             | Parkinson's disease                                                                 |
| <i>HMG2P18, KRTCAP2</i>       | Parkinson's disease                                                                 |
| <i>RAB29, NUCKS1</i>          | Parkinson's disease                                                                 |
| <i>SIPA1L2</i>                | Parkinson's disease                                                                 |

|                                         |                                              |
|-----------------------------------------|----------------------------------------------|
| <i>CCNT2-AS1</i>                        | Parkinson's disease                          |
| <i>RN7SL813P, STK39</i>                 | Parkinson's disease                          |
| <i>MCCC1</i>                            | Parkinson's disease                          |
| <i>TMEM175</i>                          | Parkinson's disease                          |
| <i>BST1</i>                             | Parkinson's disease                          |
| <i>FAM47E, FAM47E-STBD1, AC034139.1</i> | Parkinson's disease                          |
| <i>AC093866.1</i>                       | Parkinson's disease                          |
| <i>HLA-DQB1, MTCO3P1</i>                | Parkinson's disease                          |
| <i>GPNUMB</i>                           | Parkinson's disease                          |
| <i>INPP5F</i>                           | Parkinson's disease                          |
| <i>DLG2</i>                             | Parkinson's disease                          |
| <i>AP001979.1, IGSF9B</i>               | Parkinson's disease                          |
| <i>LRRK2, AC079630.1</i>                | Parkinson's disease                          |
| <i>CCDC62</i>                           | Parkinson's disease                          |
| <i>SNCA</i>                             | Parkinson's disease (age of onset)           |
| <i>PRKN</i>                             | Parkinson's disease (age of onset)           |
| <i>AC093866.1</i>                       | Parkinson's disease                          |
| <i>LRRK2, MUC19</i>                     | Parkinson's disease                          |
| <i>KANSL1</i>                           | Parkinson's disease                          |
| <i>HLA-DQB1, MTCO3P1</i>                | Parkinson's disease                          |
| <i>LINC02210-CRHR1</i>                  | Parkinson's disease                          |
| <i>TMEM175</i>                          | Parkinson's disease                          |
| <i>SETD1A</i>                           | Parkinson's disease                          |
| <i>CHL1-AS1, CHL1</i>                   | Parkinsonism in frontotemporal lobe dementia |
| <i>SP1</i>                              | Parkinsonism in frontotemporal lobe dementia |
| <i>LINC01500</i>                        | Parkinsonism in frontotemporal lobe dementia |

8 Table S3. Reactome pathways analysis results

| <a href="#">Reactome pathways</a>                                                                  | <a href="#">Number of genes</a> | <a href="#">Number of genes uploaded in the PPI</a> | <a href="#">expected</a> | <a href="#">Fold Enrichment</a> | <a href="#">±</a> | <a href="#">Fisher Test</a> | <a href="#">False Discovery Rate</a> |
|----------------------------------------------------------------------------------------------------|---------------------------------|-----------------------------------------------------|--------------------------|---------------------------------|-------------------|-----------------------------|--------------------------------------|
| <a href="#">Plasma lipoprotein assembly</a>                                                        | <a href="#">18</a>              | <a href="#">2</a>                                   | .02                      | > 100                           | +                 | 1.32E-04                    | 3.78E-02                             |
| <a href="#">Ras activation upon Ca2+ influx through NMDA receptor</a>                              | <a href="#">19</a>              | <a href="#">2</a>                                   | .02                      | > 100                           | +                 | 1.46E-04                    | 3.71E-02                             |
| <a href="#">↳ CREB1 phosphorylation through NMDA receptor-mediated activation of RAS signaling</a> | <a href="#">27</a>              | <a href="#">2</a>                                   | .02                      | 85.81                           | +                 | 2.81E-04                    | 4.02E-02                             |
| <a href="#">Negative regulation of NMDA receptor-mediated neuronal transmission</a>                | <a href="#">21</a>              | <a href="#">2</a>                                   | .02                      | > 100                           | +                 | 1.76E-04                    | 4.02E-02                             |
| <a href="#">Unblocking of NMDA receptors, glutamate binding and activation</a>                     | <a href="#">21</a>              | <a href="#">2</a>                                   | .02                      | > 100                           | +                 | 1.76E-04                    | 3.65E-02                             |
| <a href="#">Long-term potentiation</a>                                                             | <a href="#">22</a>              | <a href="#">2</a>                                   | .02                      | > 100                           | +                 | 1.92E-04                    | 3.37E-02                             |
| <a href="#">Nephrin family interactions</a>                                                        | <a href="#">23</a>              | <a href="#">2</a>                                   | .02                      | > 100                           | +                 | 2.08E-04                    | 3.17E-02                             |
| <a href="#">Golgi Associated Vesicle Biogenesis</a>                                                | <a href="#">54</a>              | <a href="#">4</a>                                   | .05                      | 85.81                           | +                 | 1.60E-07                    | 1.82E-04                             |
| <a href="#">↳ trans-Golgi Network Vesicle Budding</a>                                              | <a href="#">72</a>              | <a href="#">4</a>                                   | .06                      | 64.35                           | +                 | 4.78E-07                    | 3.64E-04                             |
| <a href="#">↳ Membrane Trafficking</a>                                                             | <a href="#">625</a>             | <a href="#">6</a>                                   | .54                      | 11.12                           | +                 | 1.02E-05                    | 3.87E-03                             |
| <a href="#">Cargo recognition for clathrin-mediated endocytosis</a>                                | <a href="#">104</a>             | <a href="#">3</a>                                   | .09                      | 33.42                           | +                 | 1.01E-04                    | 3.30E-02                             |
| <a href="#">↳ Clathrin-mediated endocytosis</a>                                                    | <a href="#">144</a>             | <a href="#">5</a>                                   | .12                      | 40.22                           | +                 | 1.38E-07                    | 3.15E-04                             |
| <a href="#">Platelet degranulation</a>                                                             | <a href="#">127</a>             | <a href="#">3</a>                                   | .11                      | 27.36                           | +                 | 1.80E-04                    | 3.43E-02                             |
| <a href="#">↳ Response to elevated platelet cytosolic Ca2+</a>                                     | <a href="#">132</a>             | <a href="#">3</a>                                   | .11                      | 26.33                           | +                 | 2.01E-04                    | 3.28E-02                             |
| Unclassified                                                                                       | <a href="#">10195</a>           | <a href="#">0</a>                                   | 8.80                     | < 0.01                          | -                 | 8.19E-06                    | 3.74E-03                             |
